# Supplementary material for: Human VPS13A is associated with multiple organelles and influences mitochondrial morphology and lipid droplet motility
Source: eLife journal article supplement (doi:10.7554/elife.43561), 2019-02-11
Supplement: supp [file elife-43561-supp-v1.zip]

Archive with 24 entries (24 files):
- elife_poa_e43561_Figure_2_figure_supplement_2.pdf
- elife_poa_e43561_Figure_1_figure_supplement_1.pdf
- elife_poa_e43561_Figure_7_figure_supplement_2.pdf
- elife_poa_e43561_Transparent_Reporting_File.pdf
- elife_poa_e43561_Figure_3_figure_supplement_3.pdf
- elife_poa_e43561_Figure_5_figure_supplement_3.pdf
- elife_poa_e43561_Figure_4_figure_supplement_1.pdf
- elife_poa_e43561_Figure_4_figure_supplement_3.pdf
- elife_poa_e43561_Figure_5_figure_supplement_1.pdf
- elife_poa_e43561_Figure_5_figure_supplement_2.pdf
- elife_poa_e43561_Figure_7_figure_supplement_3.pdf
- elife_poa_e43561_Figure_4_figure_supplement_4.pdf
- elife_poa_e43561_Figure_3_figure_supplement_2.pdf
- elife_poa_e43561_Video_1.avi
- elife_poa_e43561_Figure_9_figure_supplement_1.pdf
- elife_poa_e43561_Figure_6_figure_supplement_1.pdf
- elife_poa_e43561_Figure_3_figure_supplement_1.pdf
- elife_poa_e43561_Video_3.avi
- elife_poa_e43561_Figure_7_figure_supplement_1.pdf
- elife_poa_e43561_Figure_2_figure_supplement_1.pdf
- elife_poa_e43561_Figure_4_figure_supplement_2.pdf
- elife_poa_e43561_Figure_7_figure_supplement_4.pdf
- elife_poa_e43561_Video_2.avi
- elife_poa_e43561_Figure_3_figure_supplement_4.pdf
