# Supplementary figures and images for: Human VPS13A is associated with multiple organelles and influences mitochondrial morphology and lipid droplet motility
Source: eLife journal article supplement (doi:10.7554/elife.43561), 2019-02-11

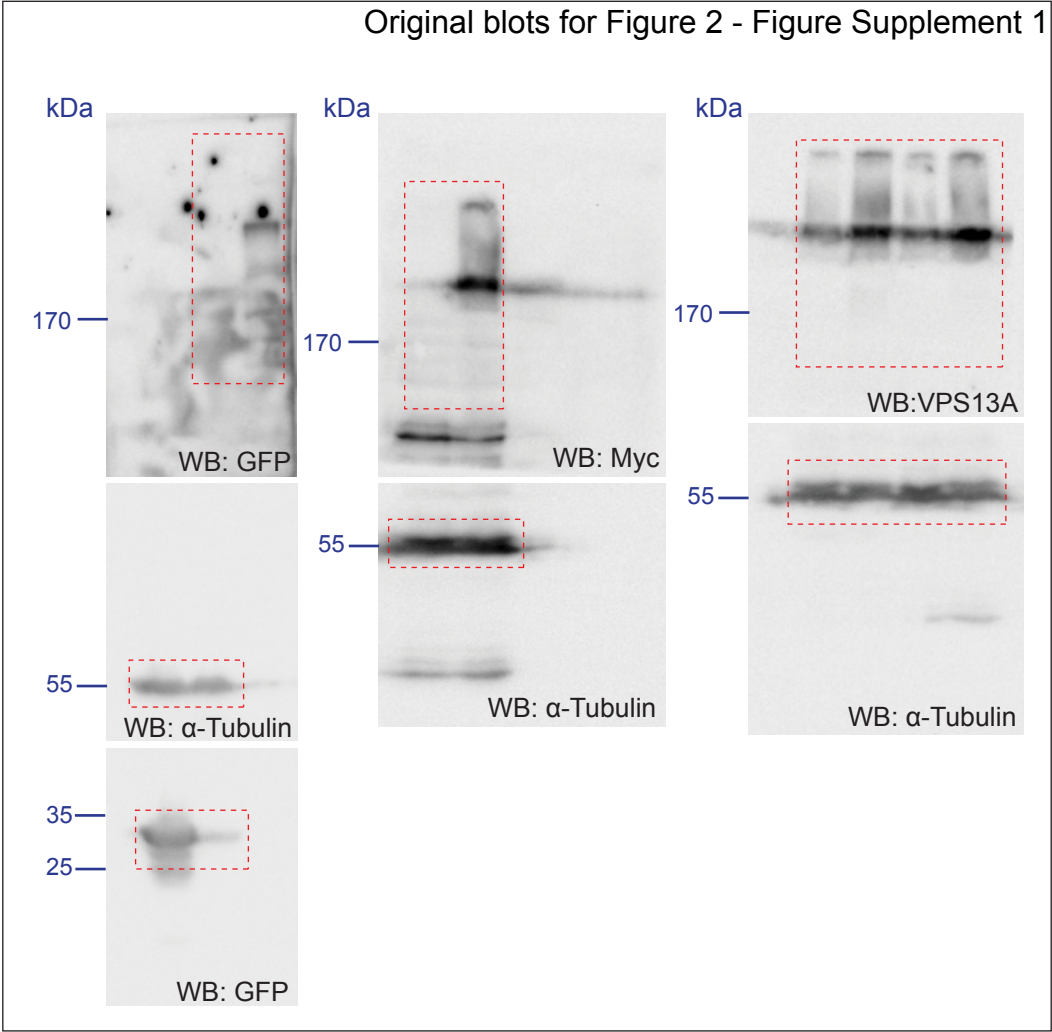

Supplement: supp [file elife-43561-supp-v1.zip › elife_poa_e43561_Figure_2_figure_supplement_2.pdf]

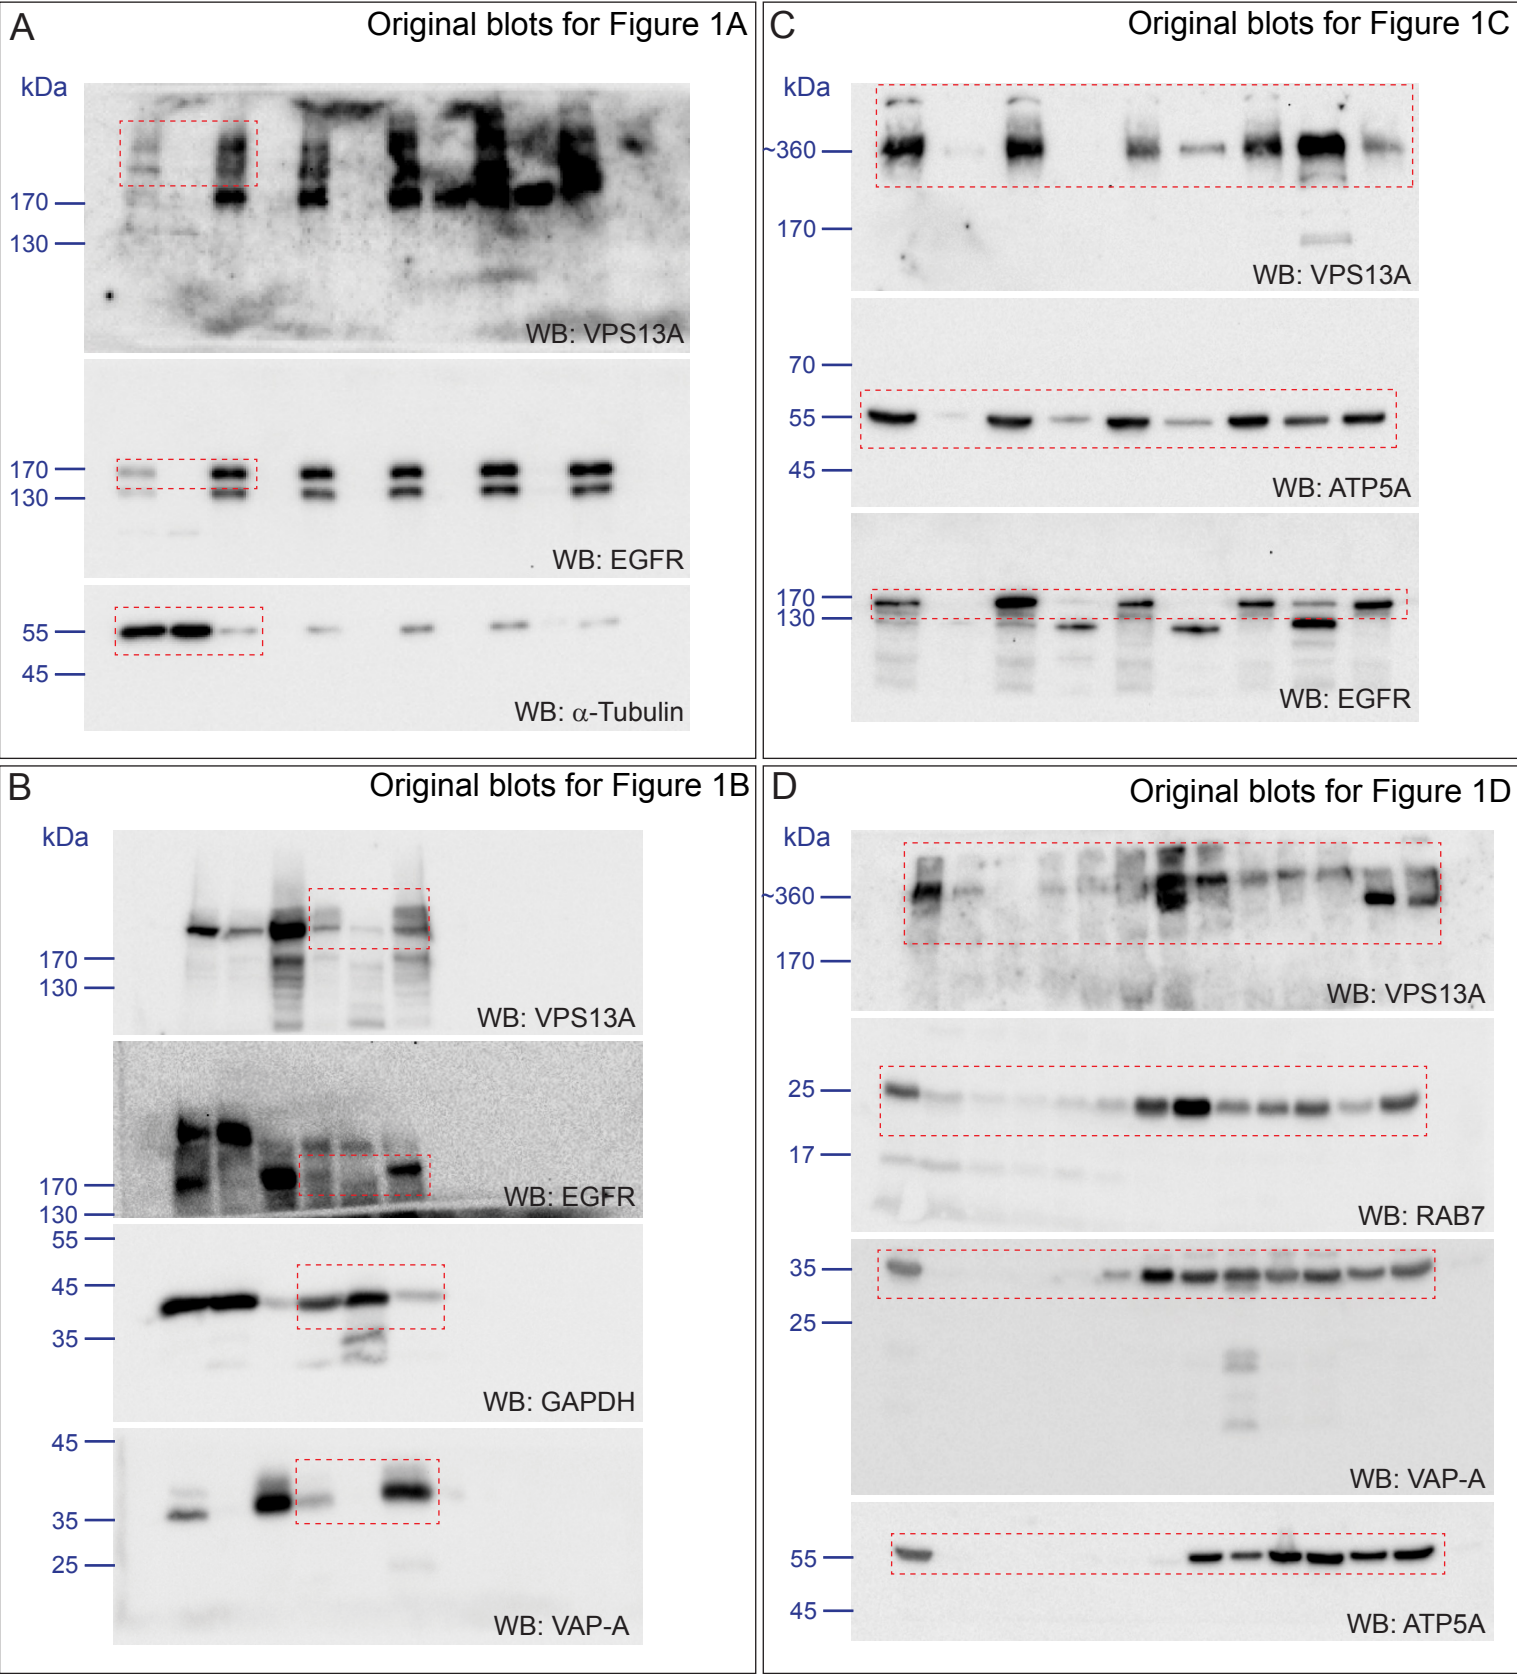

Supplement: supp [file elife-43561-supp-v1.zip › elife_poa_e43561_Figure_1_figure_supplement_1.pdf]

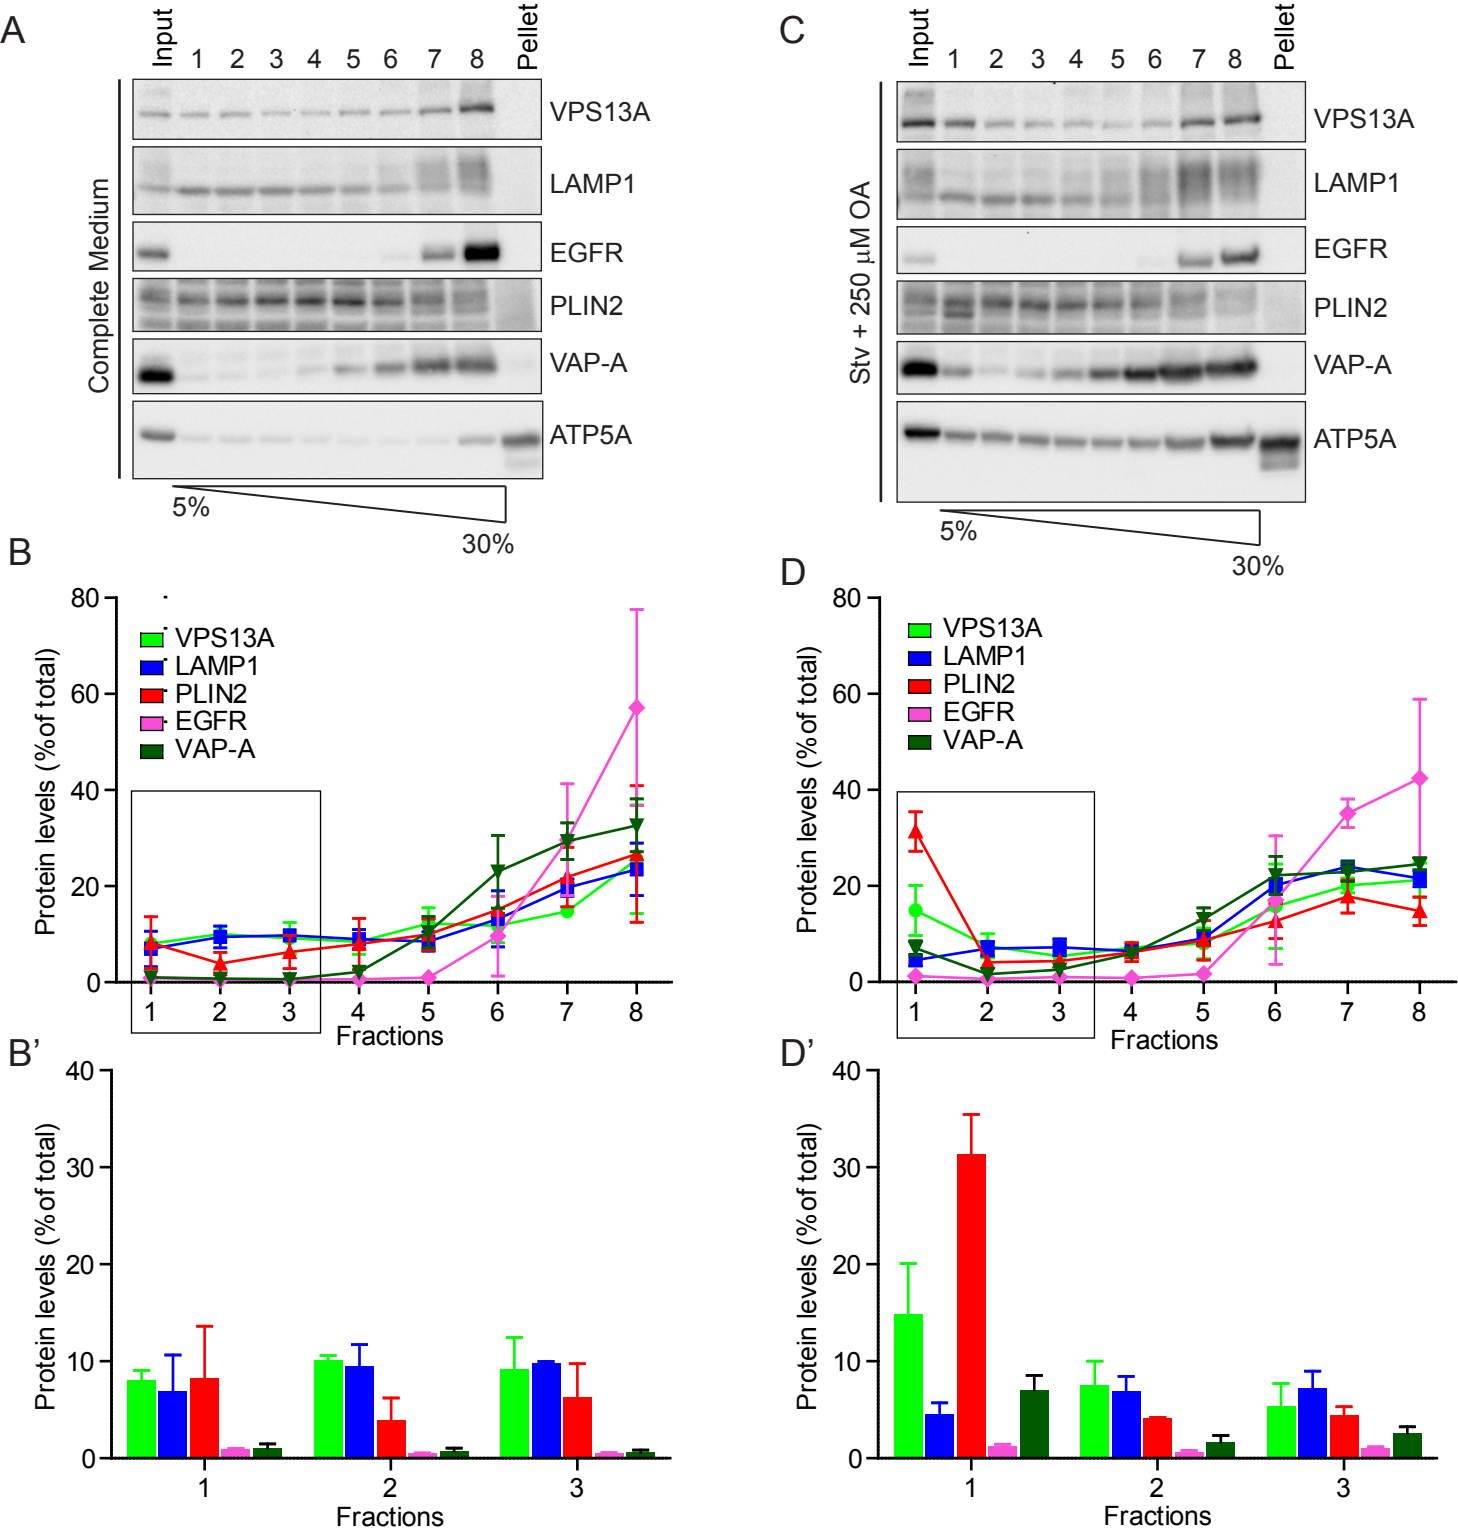

Supplement: supp [file elife-43561-supp-v1.zip › elife_poa_e43561_Figure_7_figure_supplement_2.pdf]

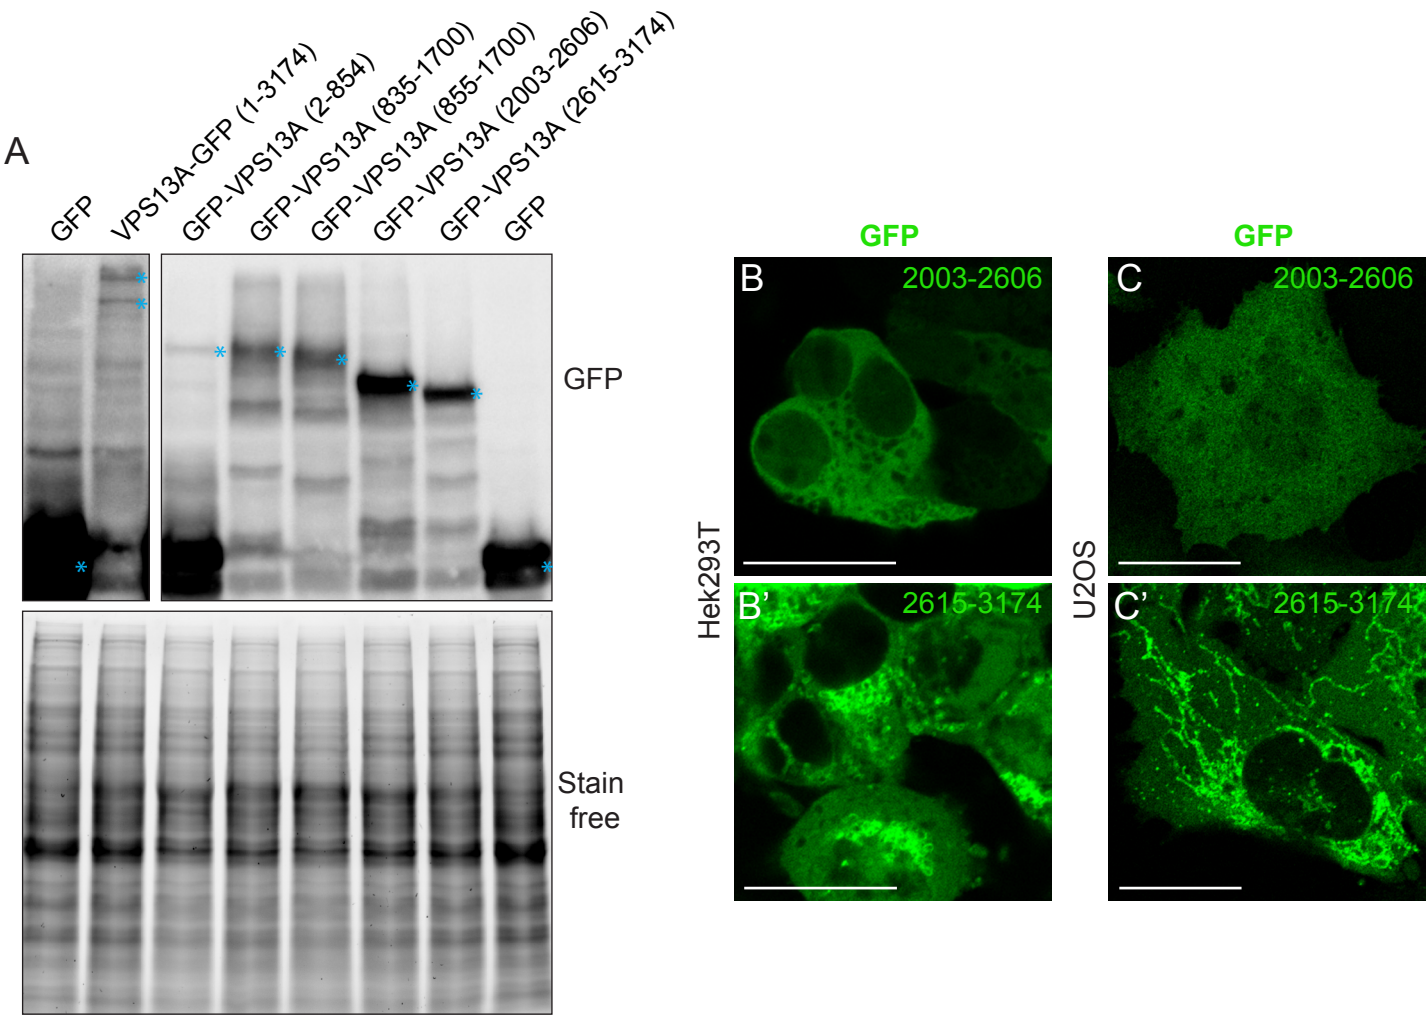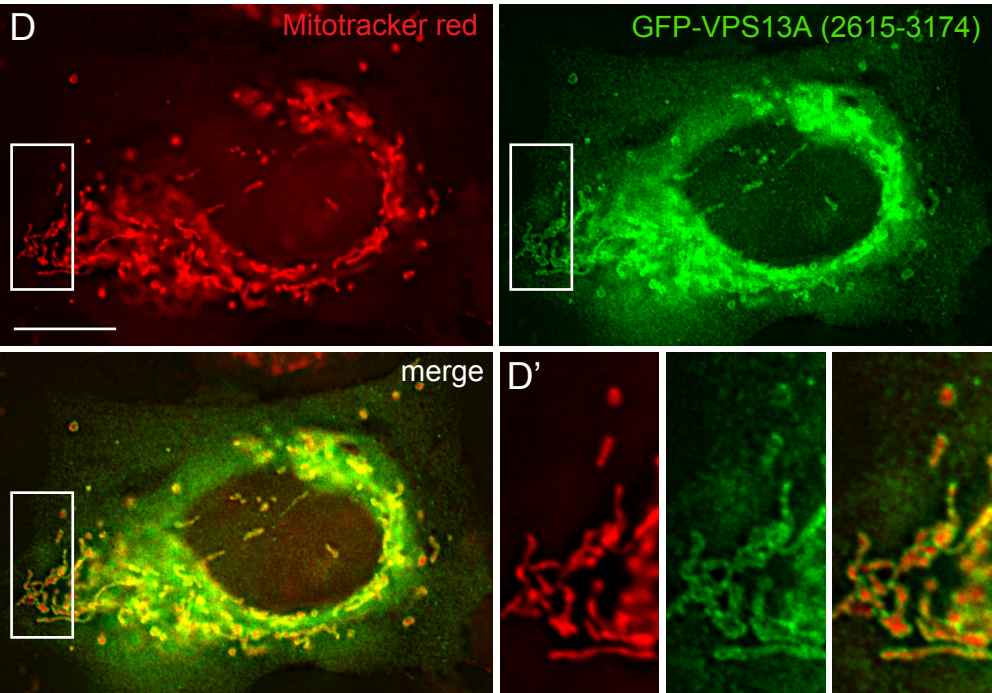

Supplement: supp [file elife-43561-supp-v1.zip › elife_poa_e43561_Figure_3_figure_supplement_3.pdf]

Original blots for Figure 5E

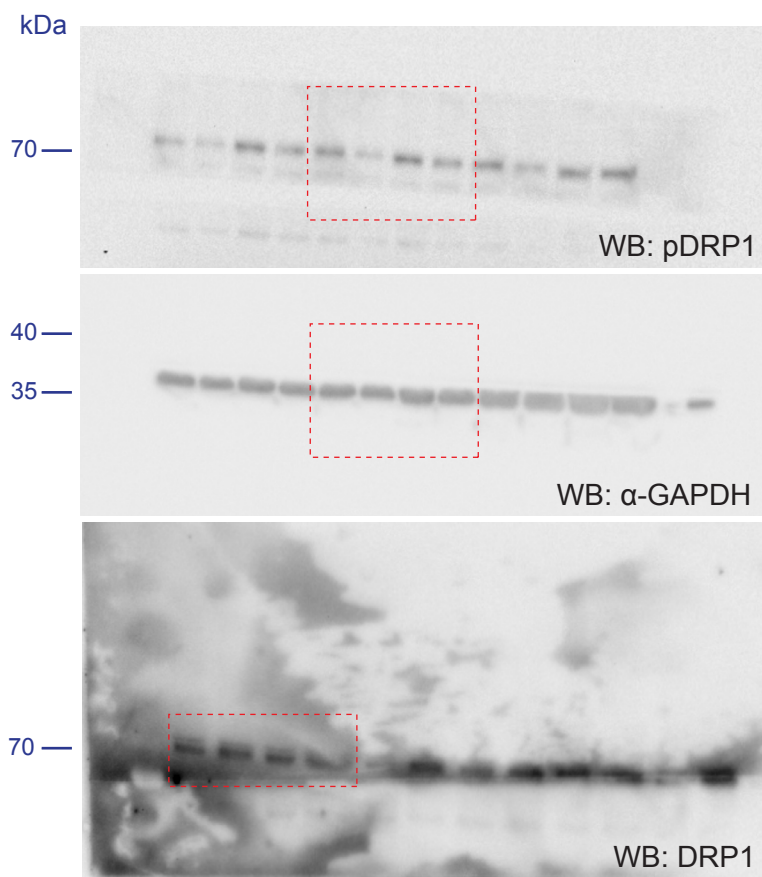

Supplement: supp [file elife-43561-supp-v1.zip › elife_poa_e43561_Figure_5_figure_supplement_3.pdf]

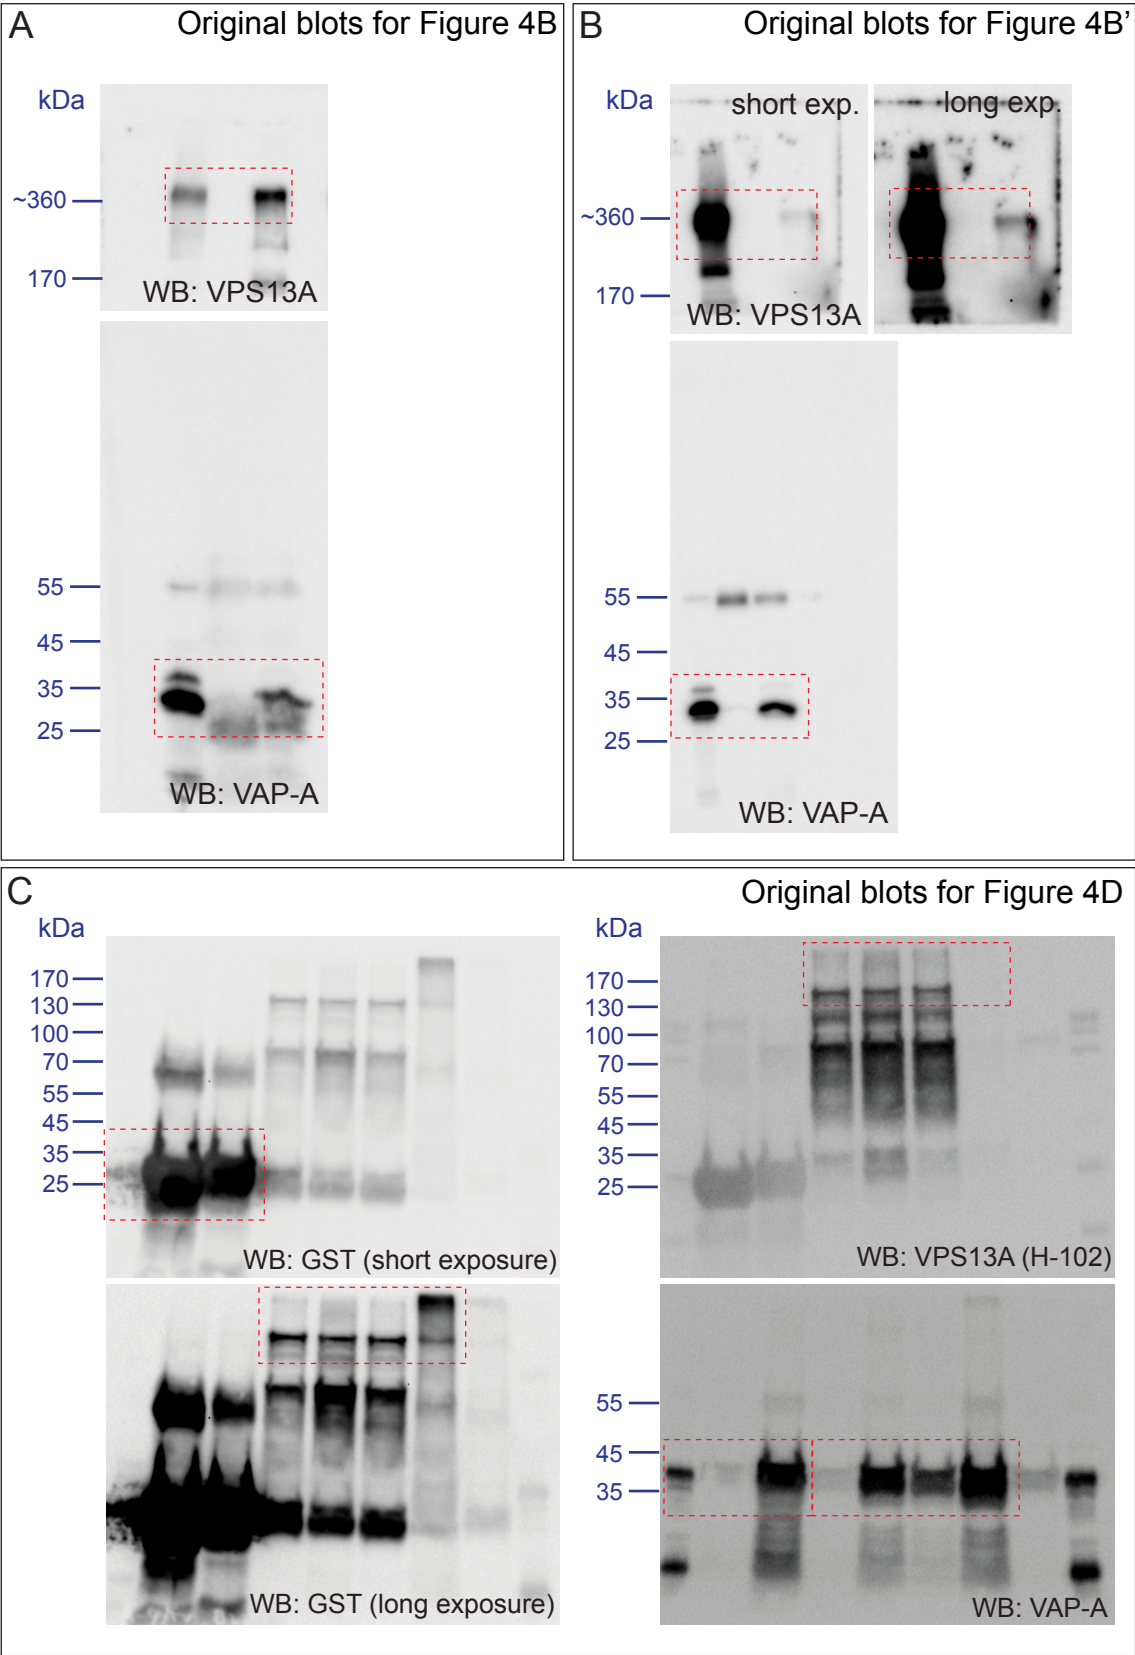

Supplement: supp [file elife-43561-supp-v1.zip › elife_poa_e43561_Figure_4_figure_supplement_1.pdf]

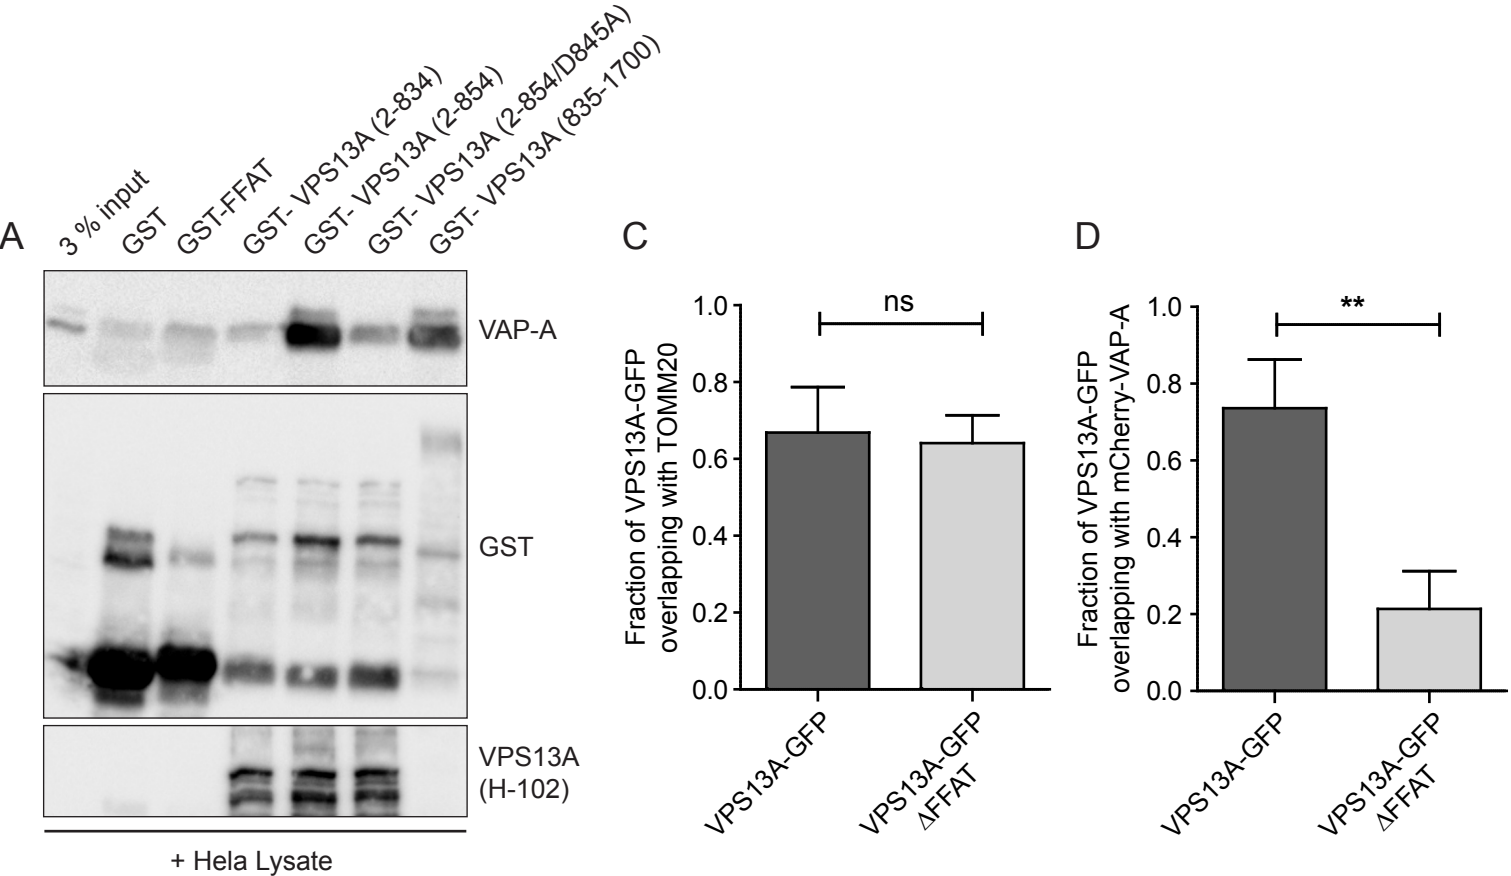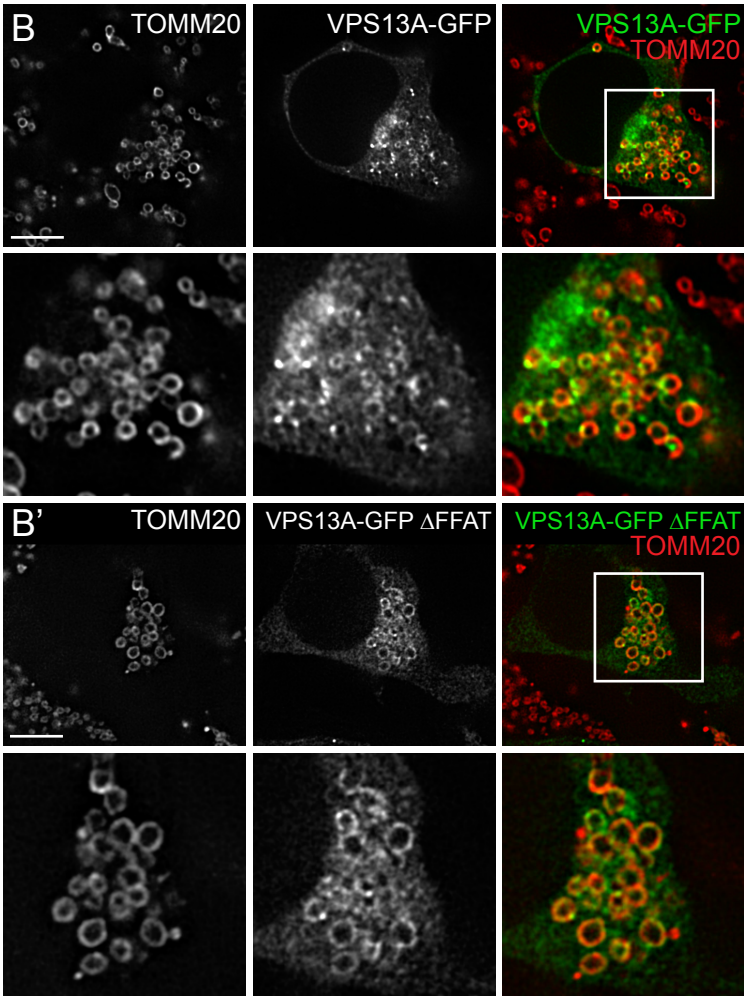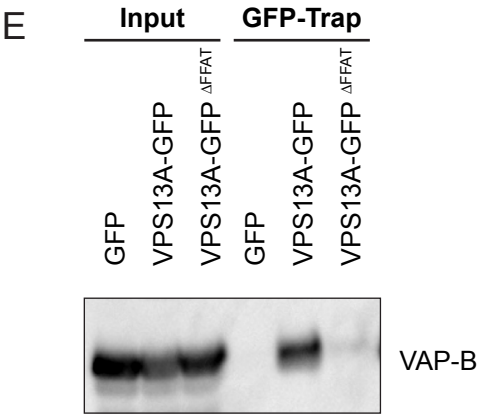

Supplement: supp [file elife-43561-supp-v1.zip › elife_poa_e43561_Figure_4_figure_supplement_3.pdf]

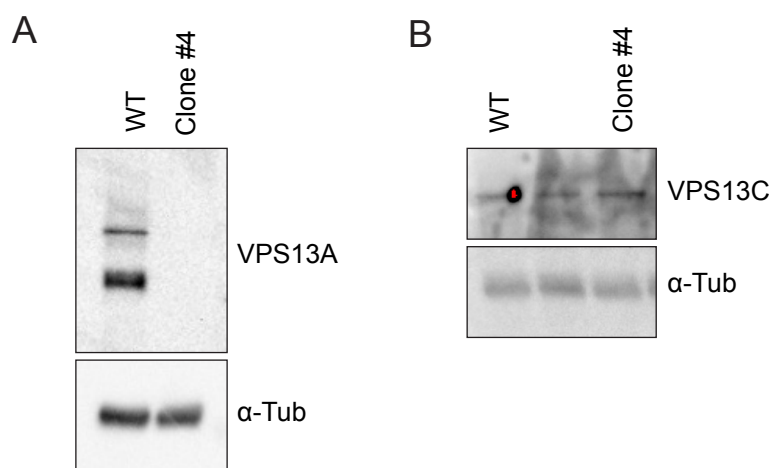

Supplement: supp [file elife-43561-supp-v1.zip › elife_poa_e43561_Figure_5_figure_supplement_1.pdf]

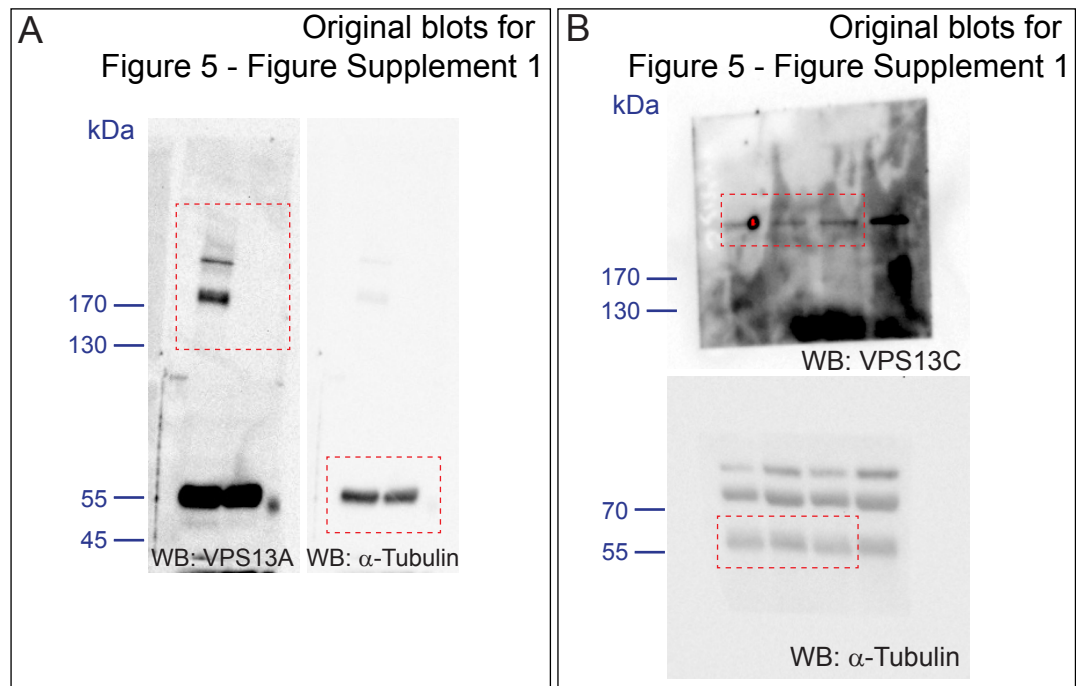

Supplement: supp [file elife-43561-supp-v1.zip › elife_poa_e43561_Figure_5_figure_supplement_2.pdf]

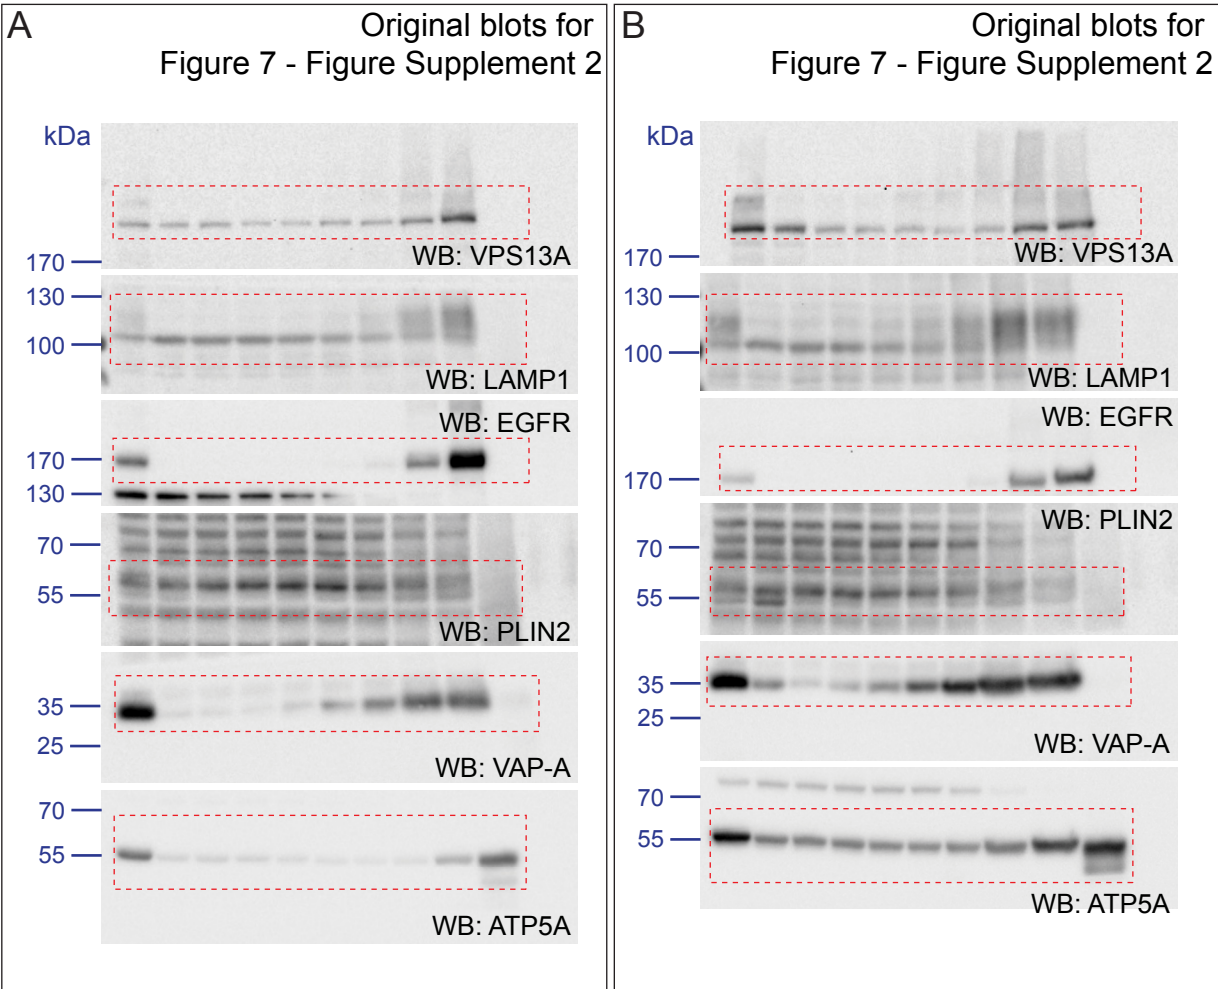

Supplement: supp [file elife-43561-supp-v1.zip › elife_poa_e43561_Figure_7_figure_supplement_3.pdf]

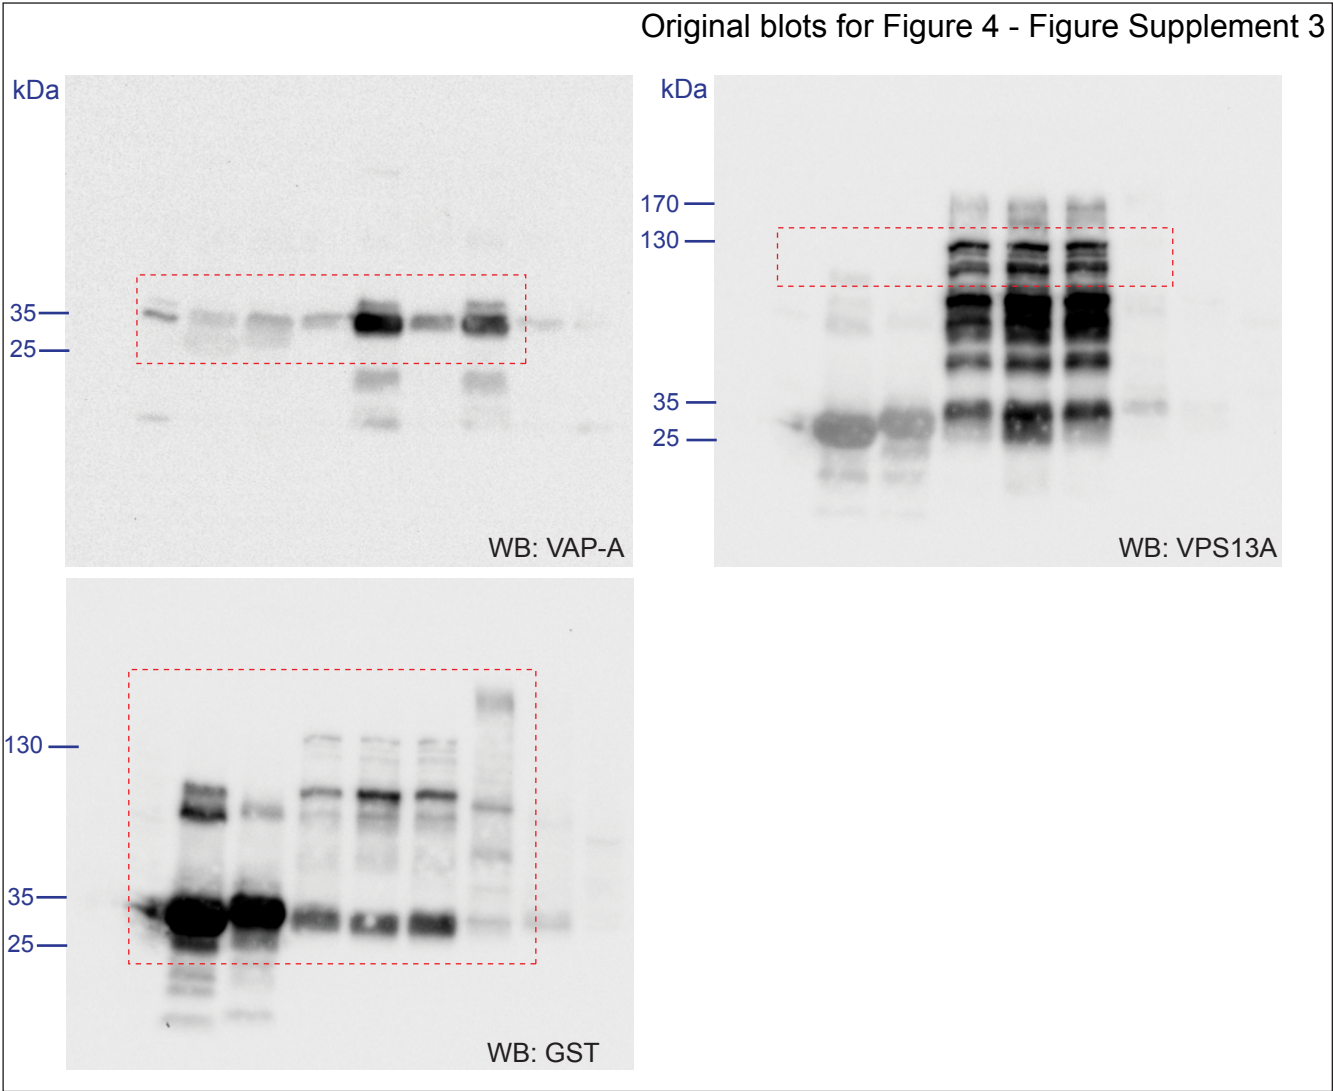

Supplement: supp [file elife-43561-supp-v1.zip › elife_poa_e43561_Figure_4_figure_supplement_4.pdf]

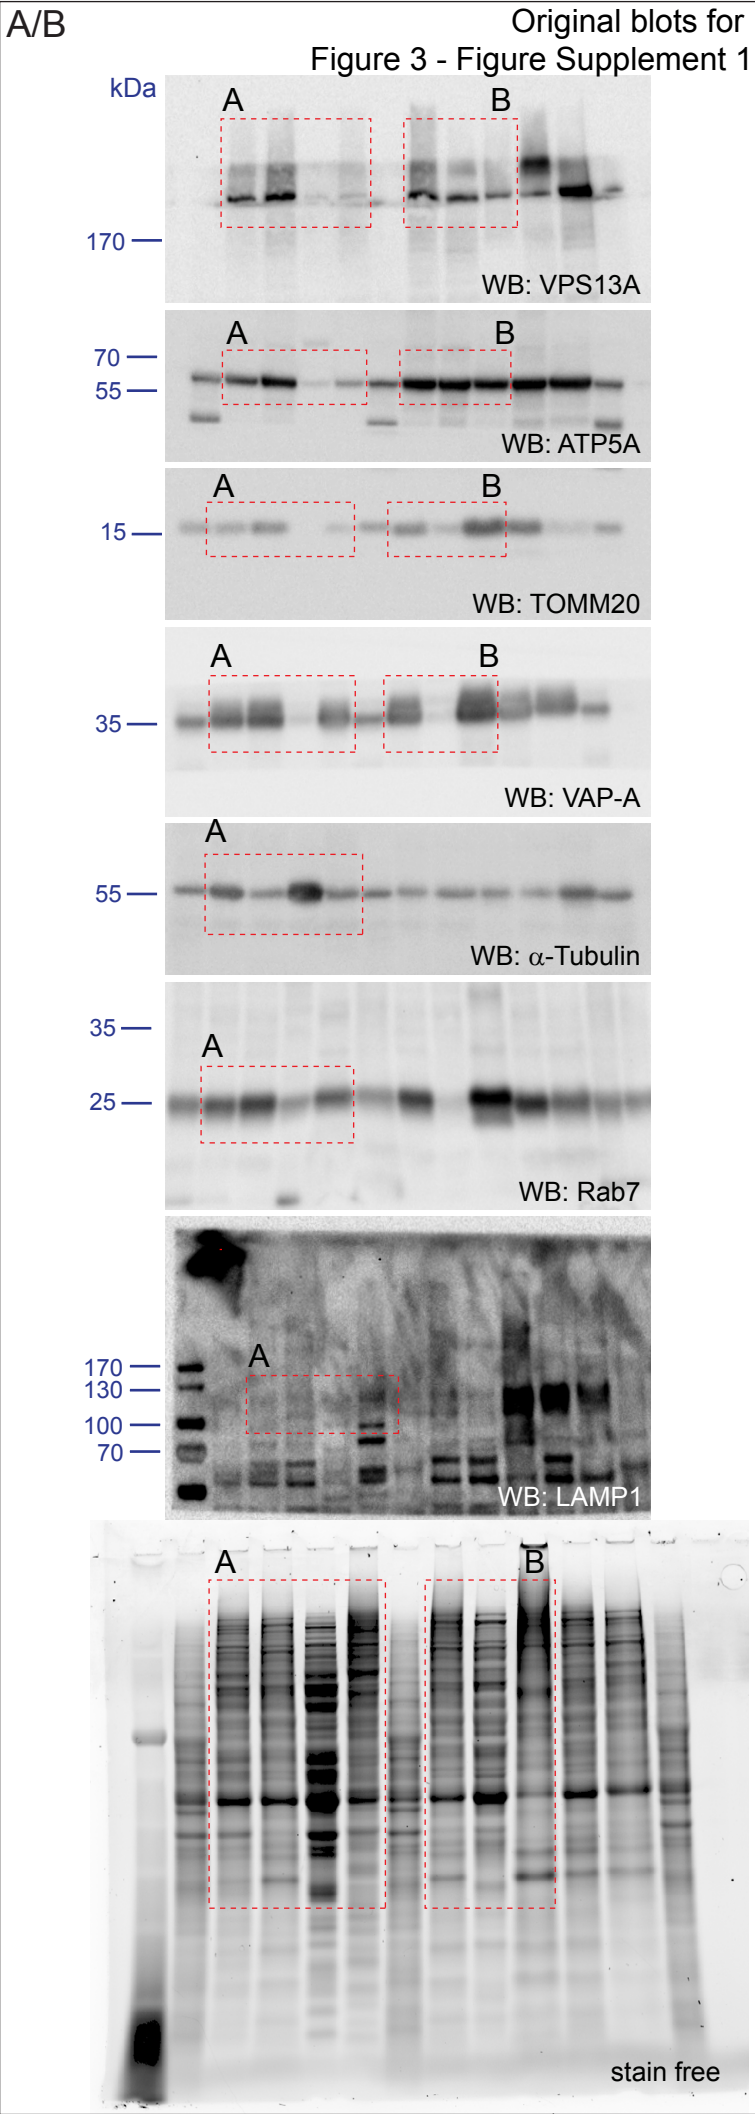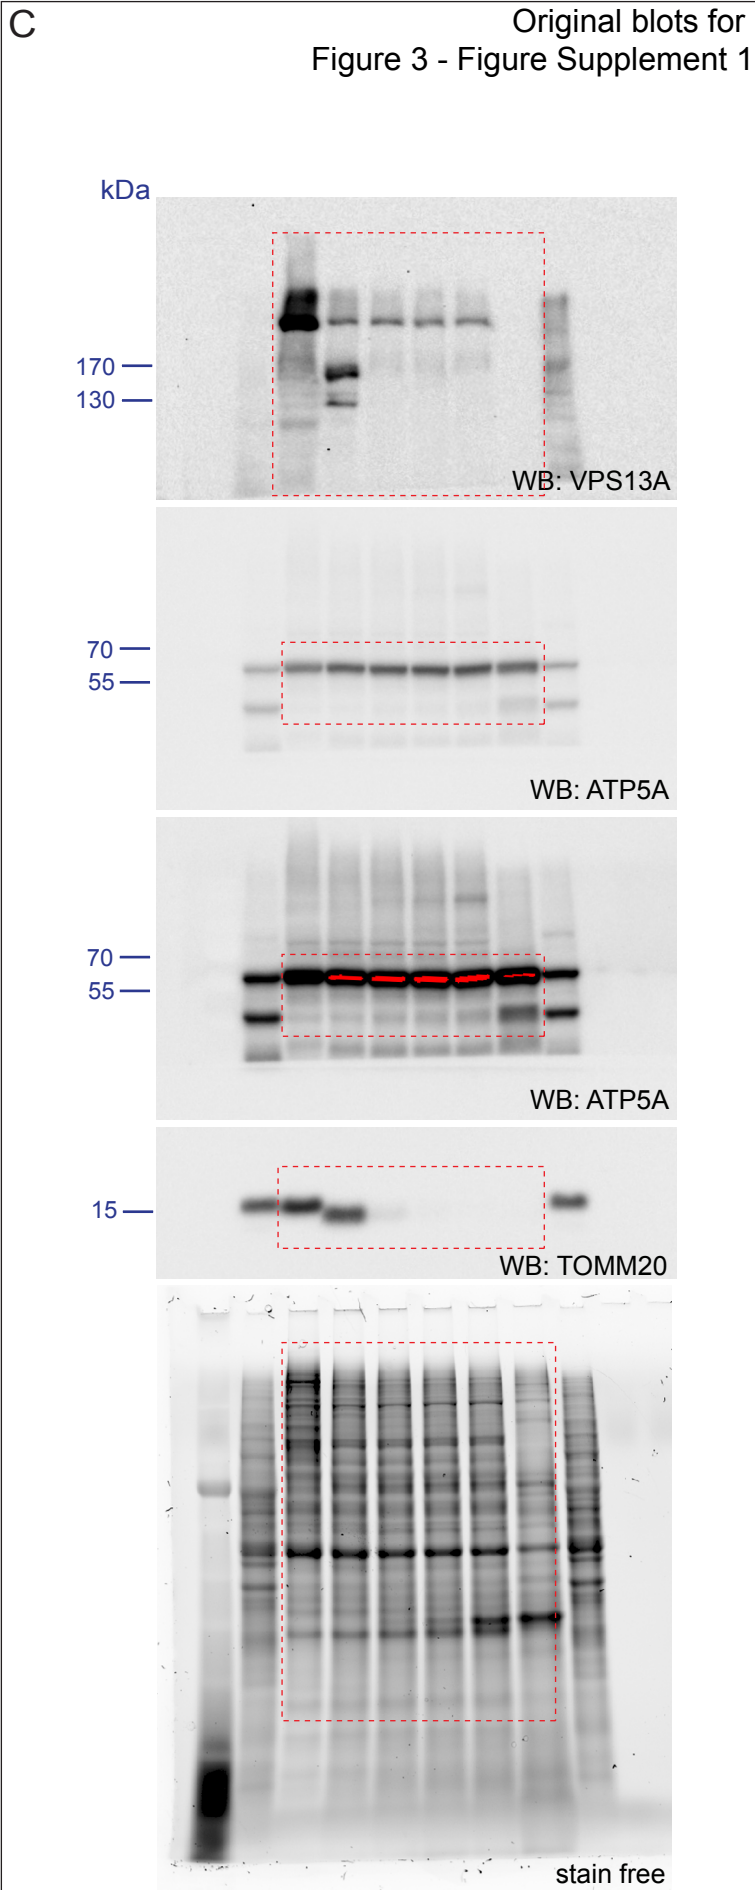

Supplement: supp [file elife-43561-supp-v1.zip › elife_poa_e43561_Figure_3_figure_supplement_2.pdf]

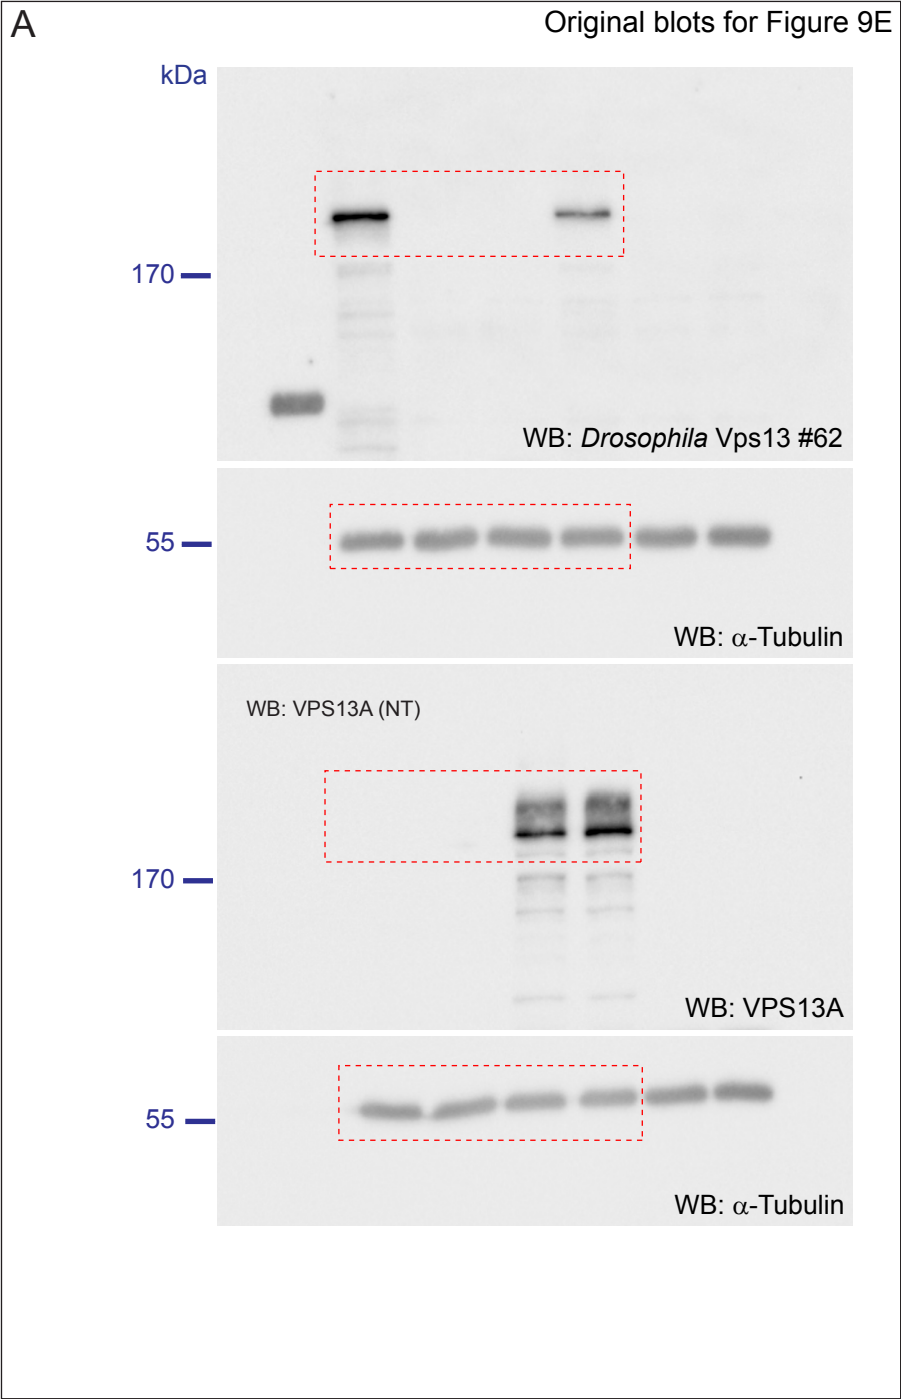

Supplement: supp [file elife-43561-supp-v1.zip › elife_poa_e43561_Figure_9_figure_supplement_1.pdf]

Yeshaw et al, Figure 6 - Figure Supplement 1

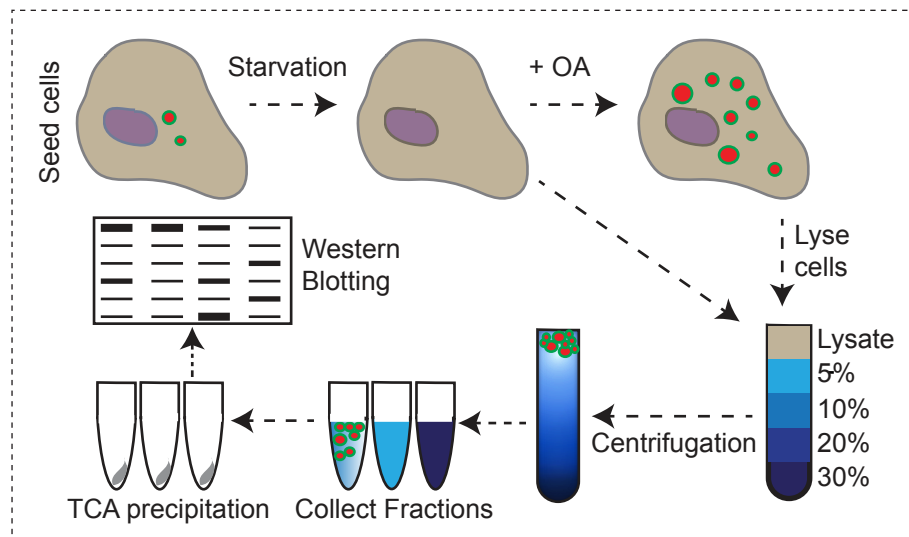

Supplement: supp [file elife-43561-supp-v1.zip › elife_poa_e43561_Figure_6_figure_supplement_1.pdf]

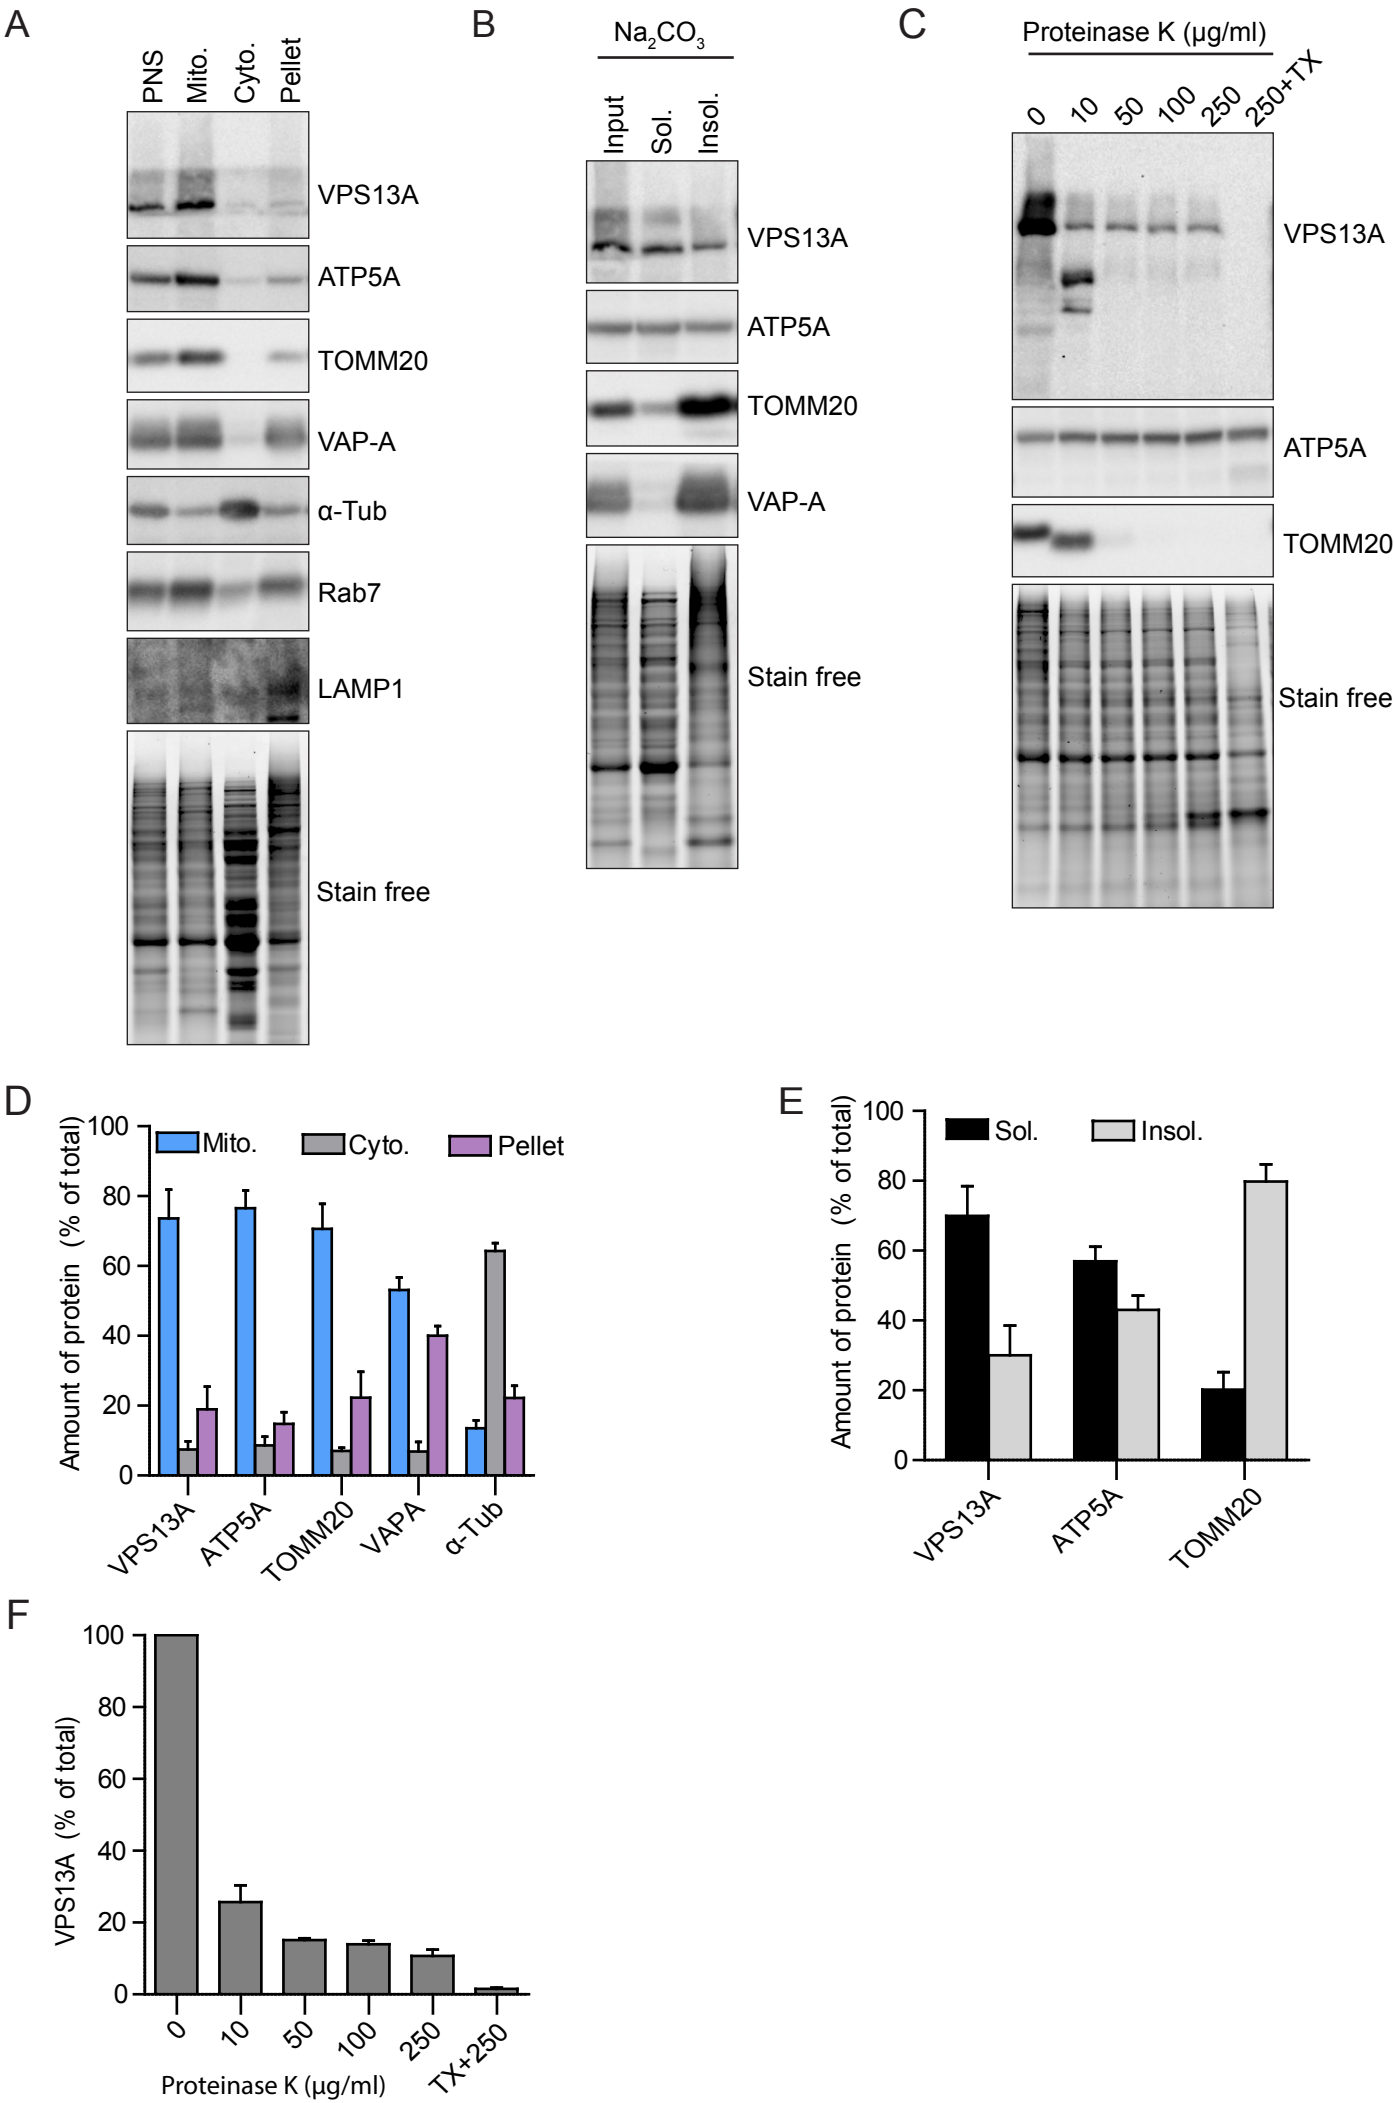

Supplement: supp [file elife-43561-supp-v1.zip › elife_poa_e43561_Figure_3_figure_supplement_1.pdf]

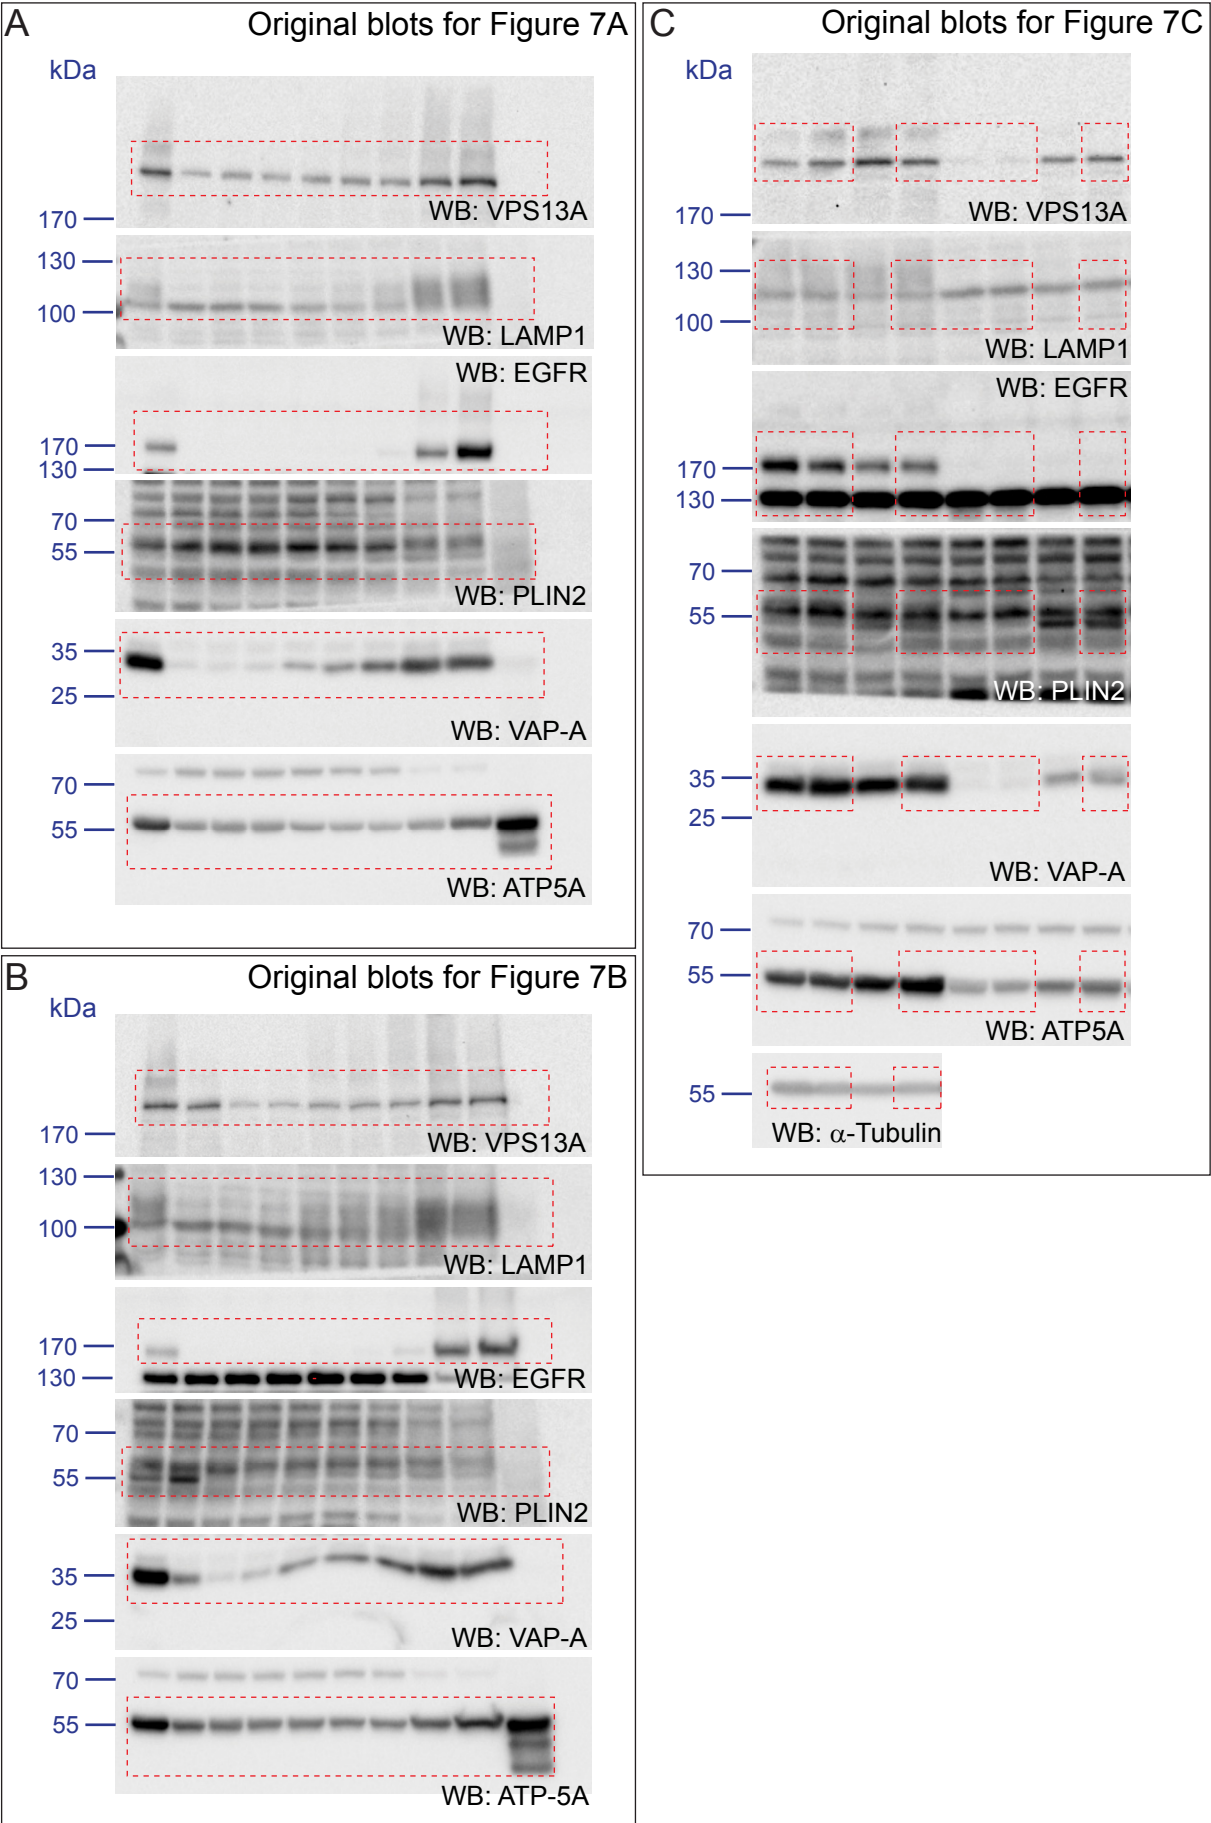

Supplement: supp [file elife-43561-supp-v1.zip › elife_poa_e43561_Figure_7_figure_supplement_1.pdf]

A

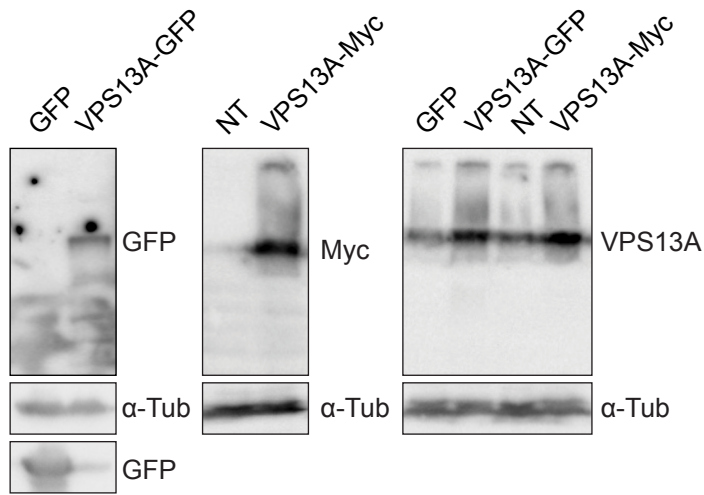

B

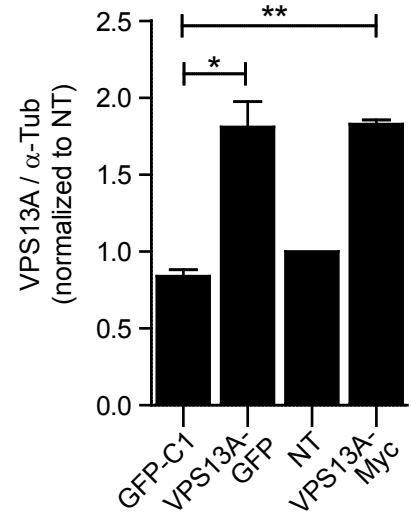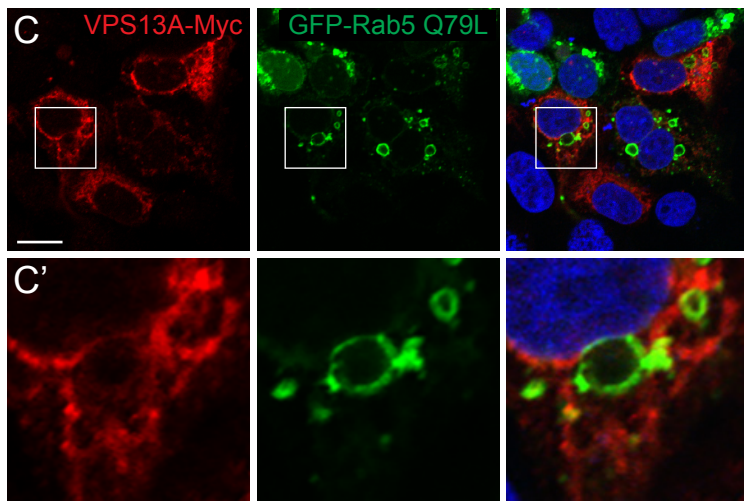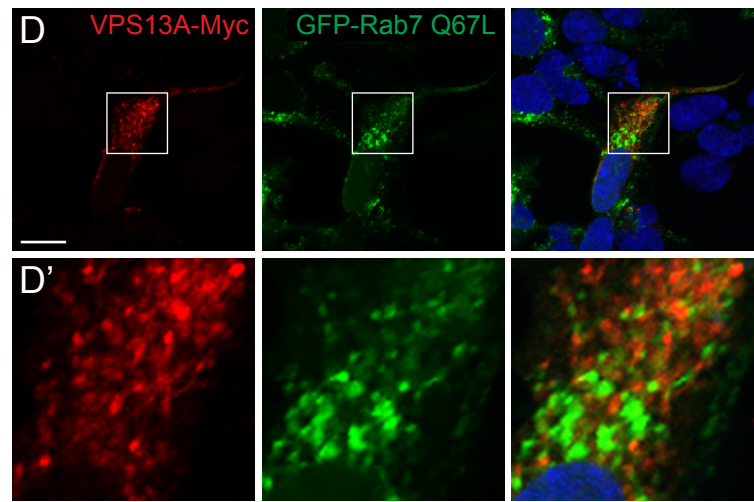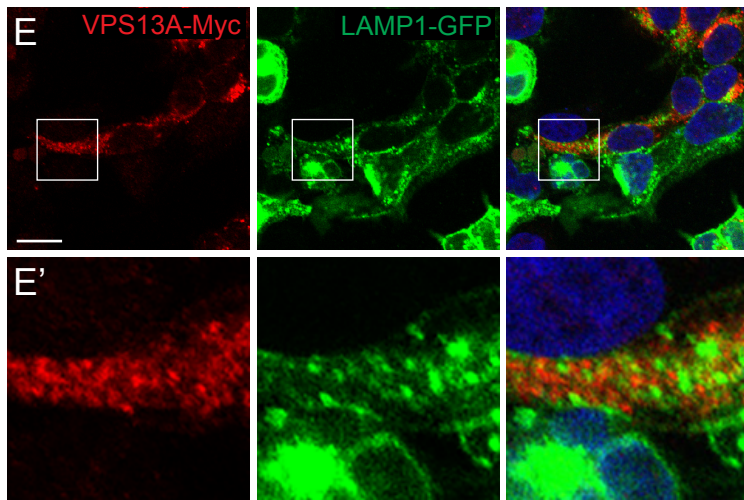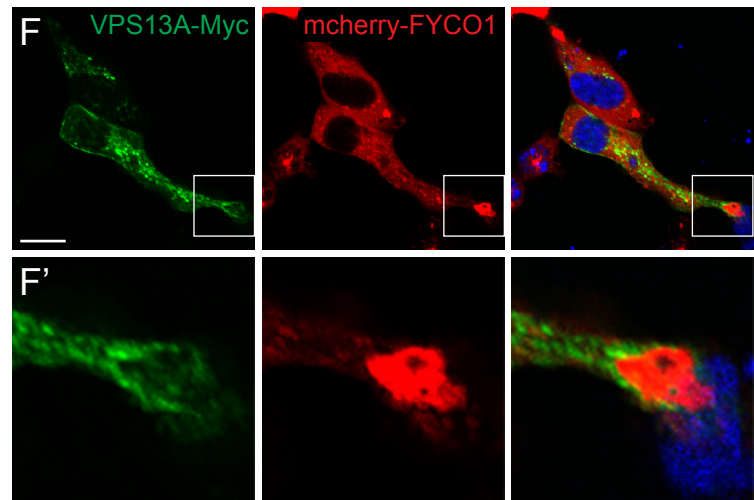

Supplement: supp [file elife-43561-supp-v1.zip › elife_poa_e43561_Figure_2_figure_supplement_1.pdf]

A Original blots for Figure 4F & Figure 4 - Figure Supplement 3E

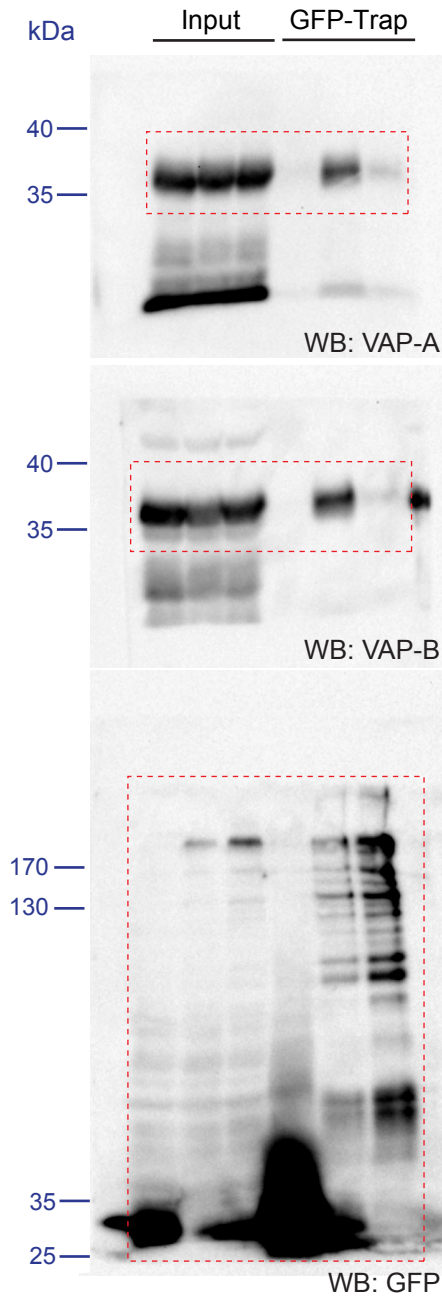

B Original blots for Figure 4G

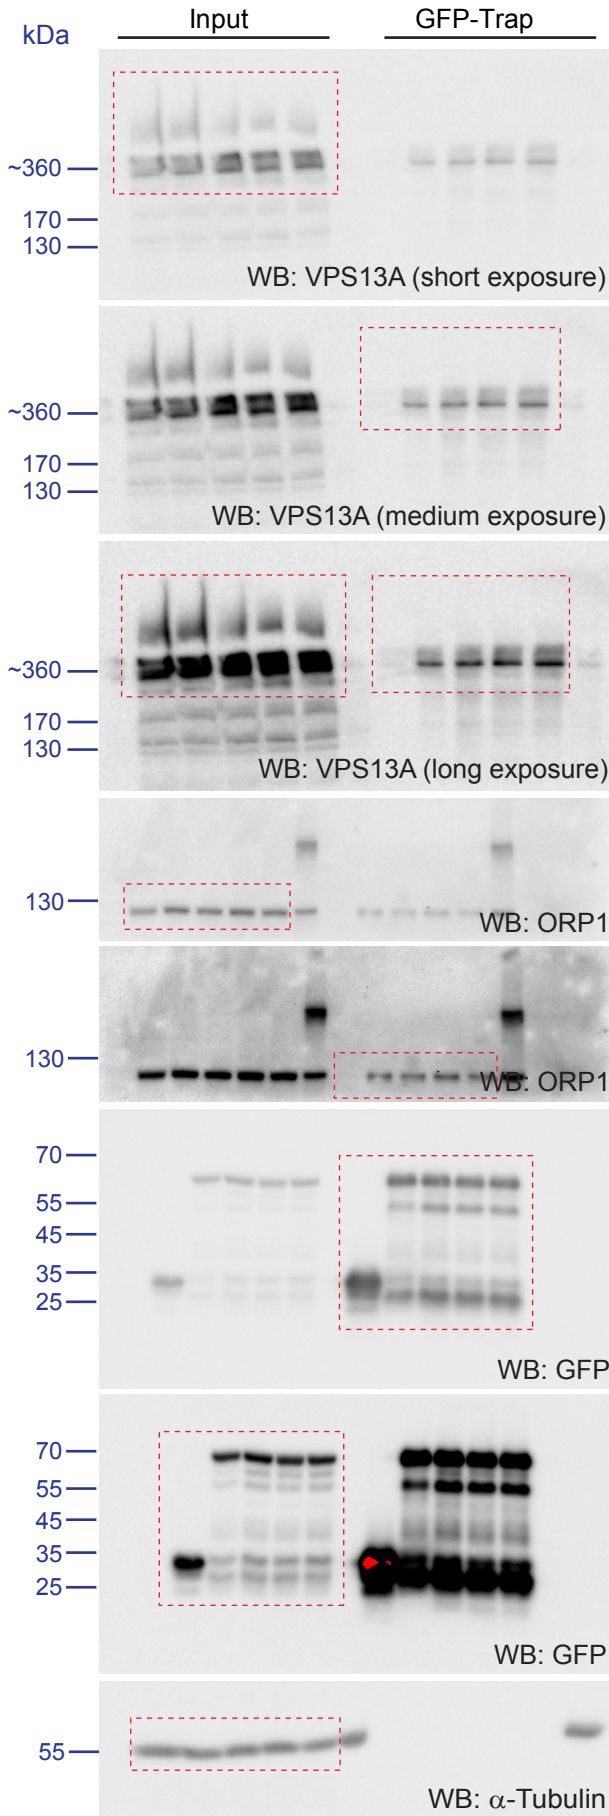

Supplement: supp [file elife-43561-supp-v1.zip › elife_poa_e43561_Figure_4_figure_supplement_2.pdf]

*Yeshaw et al, Figure 7 - Figure Supplement 4*

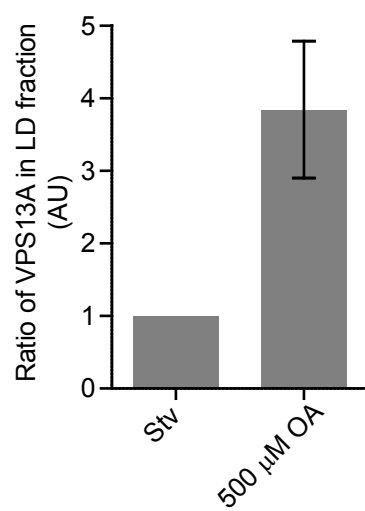

Supplement: supp [file elife-43561-supp-v1.zip › elife_poa_e43561_Figure_7_figure_supplement_4.pdf]

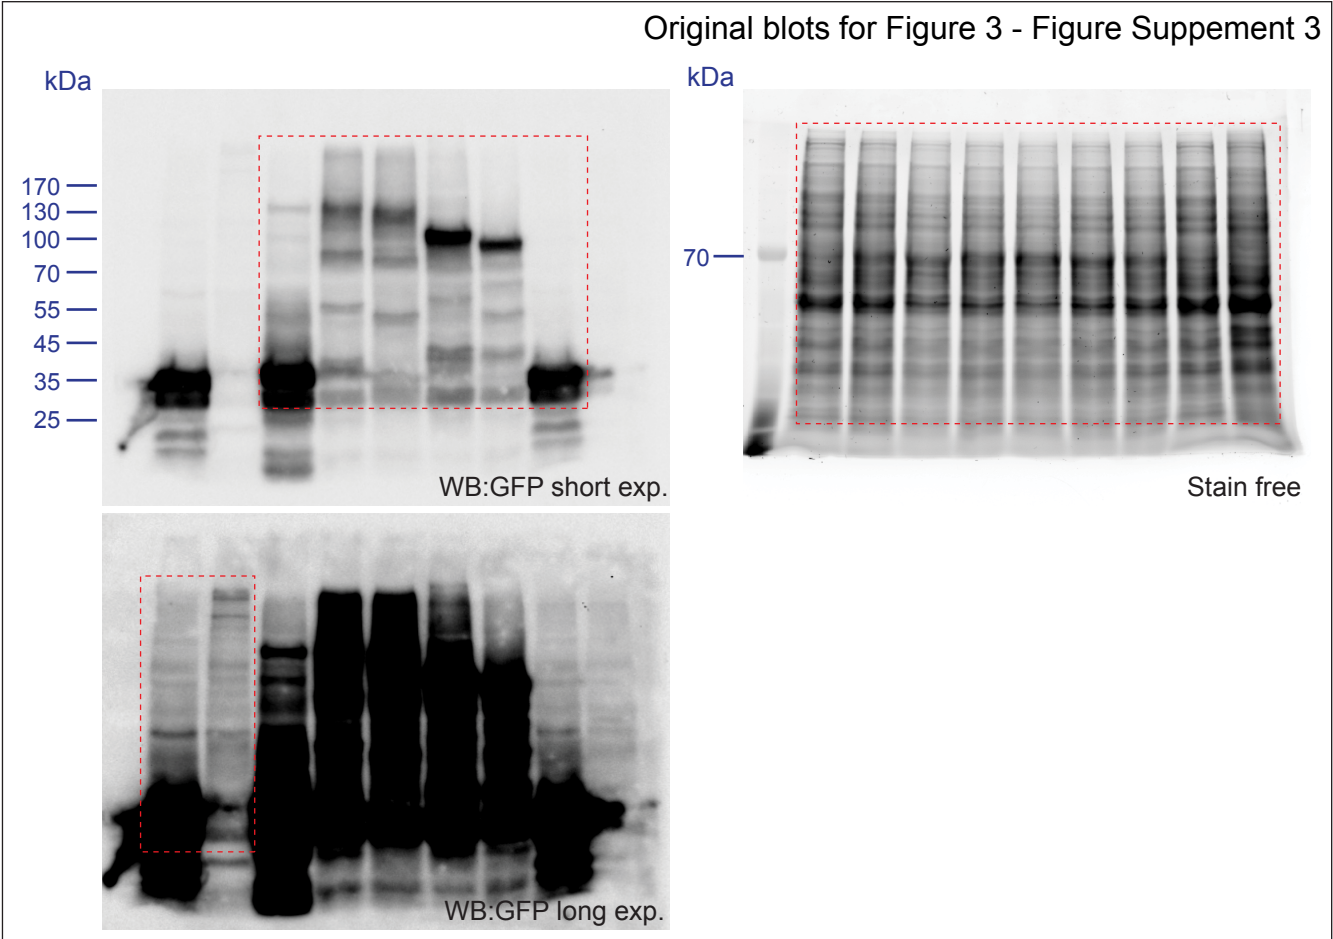

Supplement: supp [file elife-43561-supp-v1.zip › elife_poa_e43561_Figure_3_figure_supplement_4.pdf]
